# Supplementary material for: A novel system consisting of easily recyclable dendritic Ru-BINAP catalyst for asymmetric hydrogenationElectronic supplementary information (ESI) available: synthesis details, partition coefficients of dendritic BINAP ligands and their Ru complexes, hydrogenation and recycling procedure. See http://www.rsc.org/suppdata/cc/b2/b203117e/
Source: Royal Society of Chemistry journal article supplement (doi:10.1039/b203117e), 2002-06-20
Supplement: b203117e.doc [file b203117e.doc]

## Supplementary data

1. Reagents and conditions for the synthesis of dendritic ligands and their characterisation:

Reagents and conditions: NMP, CaCl2, (PhO)3P, pyridine, 1100C, 80-85%

**AB2-G1:** 1H NMR (500MHz, CDCl3): δ=8.15(s, 2H,), 7.99(d, 2H, J=9.0Hz), 7.9(d, 2H, J=10.0Hz), 7.50(m, 2H), 7.20-6.93(m, 26H), 6.70(d, 2H, J=11.5Hz), 6.64(t, 2H, J=2.0Hz), 4.01(t, 8H, J=6.5Hz), 1.83-1.78(m, 8H), 1.48-1.26(m, 56H), 0.90-0.87(t, 12H, J=6.5Hz).

31P NMR(CDCl3): -14.67ppm.

[α]20D= +88.00(c=0.5, CH2Cl2).

Ms(TOF): C98H122N2O6P2(calcd 1485.9), found 1485.9.

**AB3-G1:** 1H NMR (500MHz, CDCl3): δ=8.09(s, 2H), 7.84(d, 2H, J=7.5Hz), 7.51(d, 2H, J=8.5Hz), 7.27-7.04(m, 24H), 6.98-6.95(t, 2H, J=8.5Hz), 6.73(d, 2H, J=8.6Hz), 4.08-4.03(m, 12H), 1.87-1.76(m, 12H), 1.58-1.28(m, 84H), 0.88(m, 18H).

31P NMR(CDCl3): -14.79ppm.

[α]20D= +74.00(c=0.7, CH2Cl2).

Ms(TOF): C118H162N2O8P2(calcd 1798.5), found 1798.4.

**AB2-G2:** 1H NMR (300MHz, CDCl3): δ=8.19(s, 2H), 8.00-7.93(m, 4H), 7.52(d, 2H, J=9.0Hz), 7.55-6.60(m, 38H), 6.44(s, 4H), 5.05(s, 8H), 3.96(t, 16H, J=6.5Hz), 1.83-1.74(m, 16H), 1.47-1.29(m, 112H), 0.9(t, 24H, J=6.6Hz).

31P NMR(CDCl3): -14.65ppm.

[α]20D= +47.10(c=2.3, CH2Cl2).

Ms(TOF): C166H226N2O14P2(calcd 2533.6), found 2533.8.

**AB3-G2:** 1H NMR (500MHz, CDCl3): δ= 8.05(s, 2H), 8.00(d, 2H, J=7.0Hz), 7.83(d. 2H,J=7.0Hz), 7.53(d, 2H, J=8.0Hz), 7.31-6.95(m,24H), 6.8-6.54(m, 16H), 5.09-5.03(q, 12H, J=10.0Hz), 3.94-3.87(m, 36HHz), 1.76-1.69(m, 36HHz), 1.63-1.26(m, 252H), 0.88-0.76(m, 54H).

31P NMR(CDCl3): -14.74ppm.

[α]20D= +28.00(c=2.9, CH2Cl2).

Ms(TOF): C280H438N2O26P2(calcd 4310.4), found 4310.9.

1. Partition coefficients of dendritic BINAP ligands and their Ru complexes in n-hexane/ethanol (2.5% H2O) biphase system

| Entry | Ligand (Ru complexes) | n-Hexane phase | Ethanol phase |
| --- | --- | --- | --- |
| 1 | **AB2-G1** (**AB2-G1**-Ru) | 91.5 (90.8) | 8.5 (9.2) |
| 2 | **AB2-G2**-(**AB2-G2**-Ru) | 99.5 (99.3) | 0.5 (0.7) |
| 3 | **AB3-G1**-(**AB3-G1**-Ru) | 94.0 (93.3) | 6.0 (6.7) |
| 4 | **AB3-G2**-(**AB3-G2**-Ru) | 99.8 (99.5) | 0.2 (0.5) |
| aA mixture of 100 mg of dendritic BINAP ligand or its Ru complex and organic solvents of n-hexane/ethanol = 1:1 (v/v, 20 ml) was stirred at room temperature for 10 min. Then 0.5 ml water was added to this homogeneous system to induce phase separation. The two phases were separated and the solvents were evaporated in vacuo. The contents of the dendritic BINAP ligand or its Ru complex in each phase were determined by weighing the residue. | | | |

1. General procedure for hydrogenation reaction and catalyst recycling using Ru(**AB2**-**G2**) as catalyst:

Dendritic ligand **AB2**-**G2** (0.0011mmol) and [RuCl2(benzene)]2 (0.0005mmol) were stirred at 1000C for 20 min in dry DMF (1ml) under nitrogen. DMF was removed under reduced pressure at 300C to yield a brown solid. The resulting catalyst was dissolved in a mixture of hexane/ethanol (1.5ml/1.5ml). To the 50-ml glass-lined stainless autoclave was added the catalyst solution, substrate **2** (0.1mmol) and triethylamine (0.02ml). The autoclave was closed and was pressurized with H2 to 50 atm. The mixture was stirred with magnetic under the H2 pressure at 180C for 2h. After carefully venting hydrogen, 0.075ml water was added to the reaction mixture to induce complete phase separation. The hexane layer, which contained the catalyst, was separated, and reused in the next catalytic cycle after dried with anhydrous MgSO4. The ethanol layer was used to determine the conversion and enantioselectivity of the reduced product by GC.
